# Supplementary material for: Platform Economy: Beyond the Traveled Paths
Source: Springer Nature journal article supplement (doi:10.1007/s12599-022-00775-7), 2022-10-01
Supplement: MOESM1 [file 23661814]

# **Platform Economy: Beyond the Traveled Paths**

**David Dann, Timm Teubner, Sunil Wattal**

Business & Information Systems Engineering (2022)

**Appendix (available online via <http://link.springer.com>)**

# Online Appendix

## Stimulus Material

Thank you very much for taking part in this survey today (which will take only a few minutes of your time). In this survey, you will be asked to provide your assessment of a product on an e-commerce website. As you will see, the product has an average rating score (1.00 to 5.00 stars) which is based on a certain number of reviews.

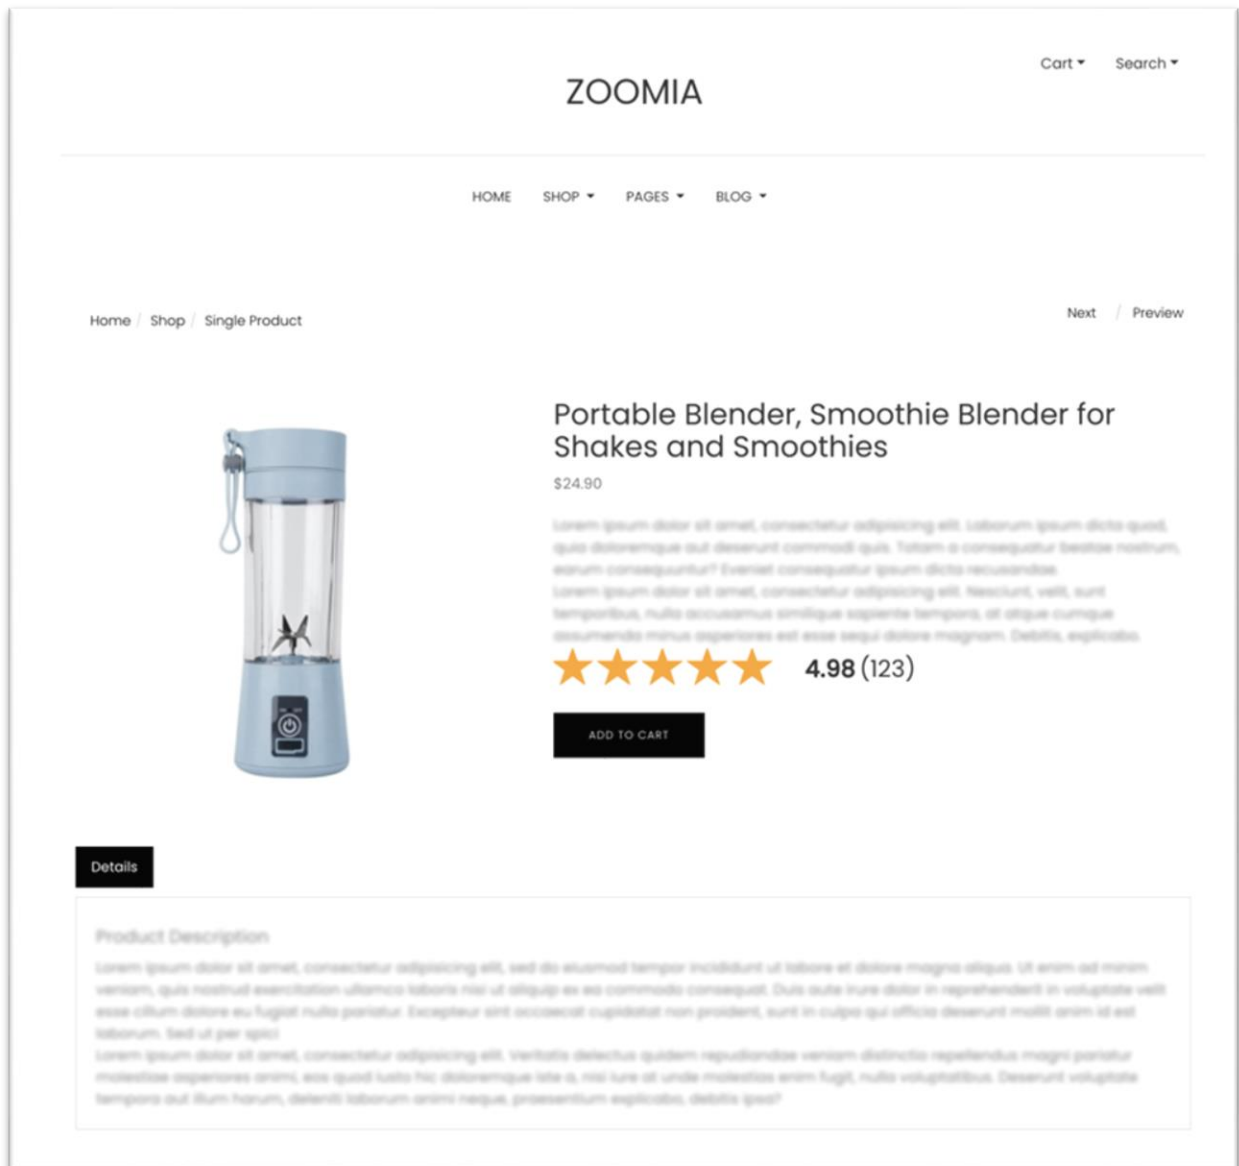

Figure A1: Fictive e-vendor website

**Table A1: Stimulus Material (Products)**

| <b>Image</b>                                                                        | <b>Product description</b>                                     | <b>Prices (US\$)</b>    |
|-------------------------------------------------------------------------------------|----------------------------------------------------------------|-------------------------|
|    | HDMI to VGA Adapter (Male to Female) –<br>Black                | 4.90<br>9.90<br>15.90   |
|    | Stainless Steel Cordless Electric Kettle                       | 19.90<br>24.90<br>29.90 |
|   | Metal Flexible Desk Lamp – Black                               | 9.90<br>14.90<br>19.90  |
|  | Bluetooth Headphones Over Ear with<br>Microphone, foldable     | 14.90<br>19.90<br>24.90 |
|  | Pullover Hooded Sweatshirt – Grey                              | 21.90<br>27.90<br>33.90 |
|  | Portable Blender, Smoothie Blender for<br>Shakes and Smoothies | 24.90<br>29.90<br>34.90 |

## Measurement Instrument

| Table A2: Items |                                                              |                     |
|-----------------|--------------------------------------------------------------|---------------------|
| Item            |                                                              | Cronbach's $\alpha$ |
| <b>Trust1</b>   | I would feel comfortable buying this product.                | 0.83                |
| <b>Trust2</b>   | I assess this product to have good quality.                  |                     |
| <b>Trust3</b>   | Overall, I would trust this product.                         |                     |
| <b>Cred1</b>    | I feel that I can rely on the product's rating score.        | 0.94                |
| <b>Cred2</b>    | The product's rating score seems credible to me.             |                     |
| <b>Cred3</b>    | I do not see any reason to doubt the product's rating score. |                     |

## Rating Valence and Volume

| Table A3: Rating valence frequency |    |       |    |       |    |       |    |
|------------------------------------|----|-------|----|-------|----|-------|----|
| Score                              | N  | Score | N  | Score | N  | Score | N  |
| 1.00                               | 9  | 3.00  | 15 | 4.00  | 12 | 4.90  | 15 |
| 1.20                               | 11 | 3.10  | 6  | 4.05  | 11 | 4.91  | 14 |
| 1.40                               | 12 | 3.20  | 20 | 4.10  | 12 | 4.92  | 6  |
| 1.60                               | 13 | 3.30  | 10 | 4.15  | 13 | 4.93  | 12 |
| 1.80                               | 15 | 3.40  | 8  | 4.20  | 14 | 4.94  | 13 |
| 2.00                               | 12 | 3.50  | 13 | 4.25  | 9  | 4.95  | 18 |
| 2.20                               | 11 | 3.60  | 11 | 4.30  | 10 | 4.96  | 6  |
| 2.40                               | 13 | 3.70  | 9  | 4.35  | 11 | 4.97  | 17 |
| 2.60                               | 15 | 3.80  | 8  | 4.40  | 11 | 4.98  | 12 |
| 2.80                               | 10 | 3.90  | 9  | 4.45  | 10 | 4.99  | 13 |
|                                    |    |       |    | 4.50  | 9  | 5.00  | 16 |
|                                    |    |       |    | 4.55  | 13 |       |    |
|                                    |    |       |    | 4.60  | 15 |       |    |
|                                    |    |       |    | 4.65  | 12 |       |    |
|                                    |    |       |    | 4.70  | 8  |       |    |
|                                    |    |       |    | 4.75  | 7  |       |    |
|                                    |    |       |    | 4.80  | 12 |       |    |
|                                    |    |       |    | 4.85  | 14 |       |    |

| Table A4: Rating volume frequency |    |             |    |
|-----------------------------------|----|-------------|----|
| Range                             | N  | Range       | N  |
| [5, 8]                            | 79 | [65, 128]   | 72 |
| [9, 16]                           | 73 | [129, 256]  | 75 |
| [17, 32]                          | 73 | [257, 512]  | 54 |
| [33, 64]                          | 69 | [513, 1000] | 80 |
